# Supplementary material for: Size and emission color tuning in the solution phase synthesis of highly luminescent germanium nanocrystals
Source: Royal Society of Chemistry journal article supplement (doi:10.1039/c4tc00319e), 2014-01-01
Supplement: c4tc00319e1.pdf [file c4tc00319e1.pdf]

Supporting Information for  
**Size and Emission Colour Tuning in the Solution Phase Synthesis of  
Highly Luminescent Germanium Nanocrystals**

Darragh P. Carolan <sup>a</sup> and Hugh Doyle <sup>a</sup>

<sup>a</sup> Tyndall National Institute, University College Cork, Lee Maltings, Cork, Ireland.  
Email: hugh.doyle@tyndall.ie

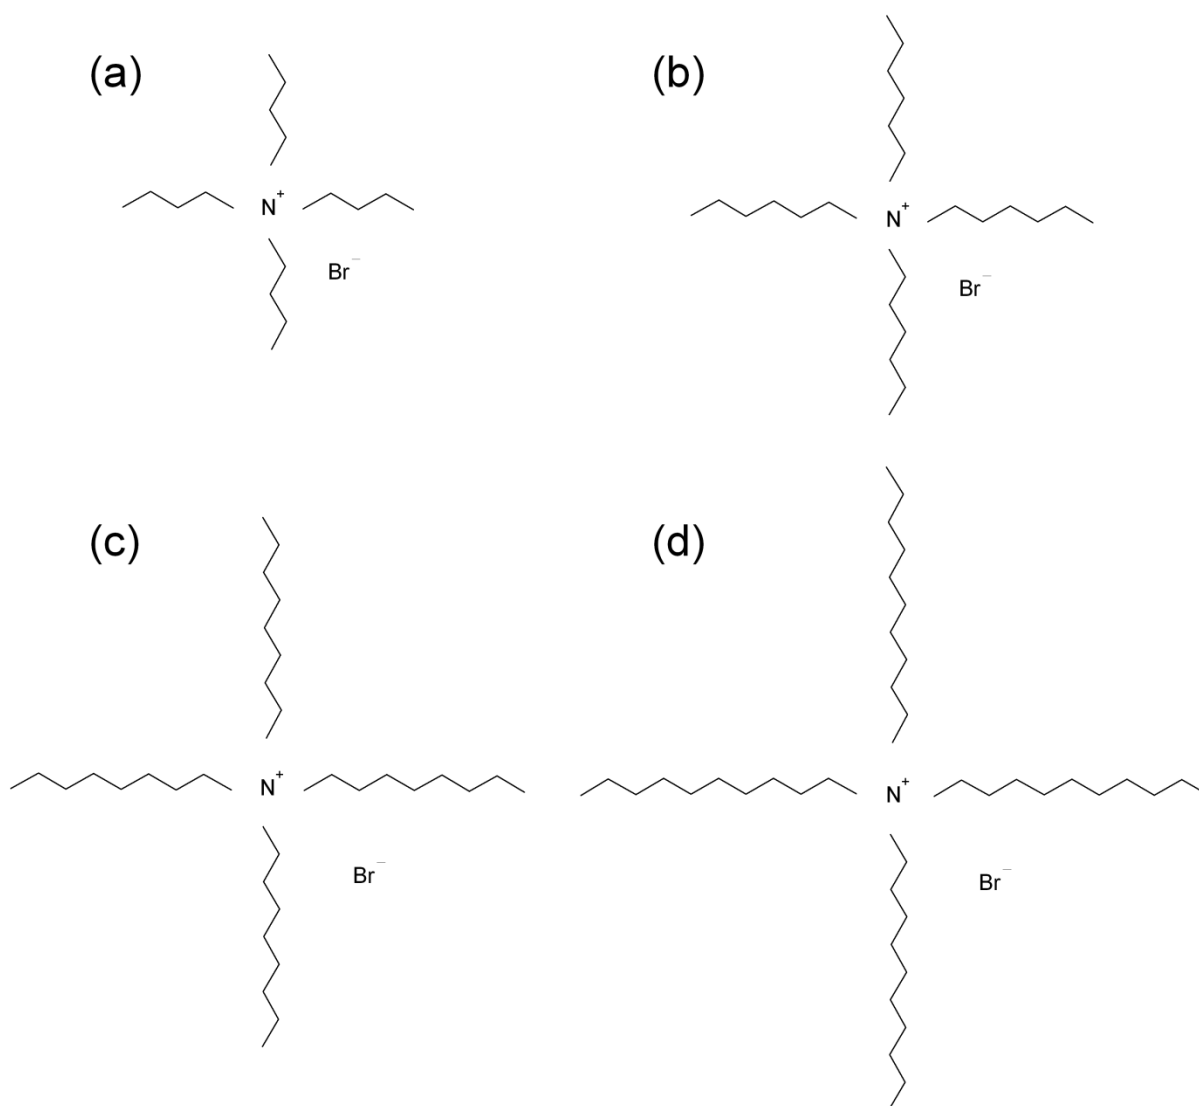

**Fig. ESI1.** Chemical structures of the cationic quaternary ammonium surfactants used in this study: a) tetrabutylammonium bromide, b) tetrahexylammonium bromide, c) tetraoctylammonium bromide and d) tetra(kis)decylammonium bromide.

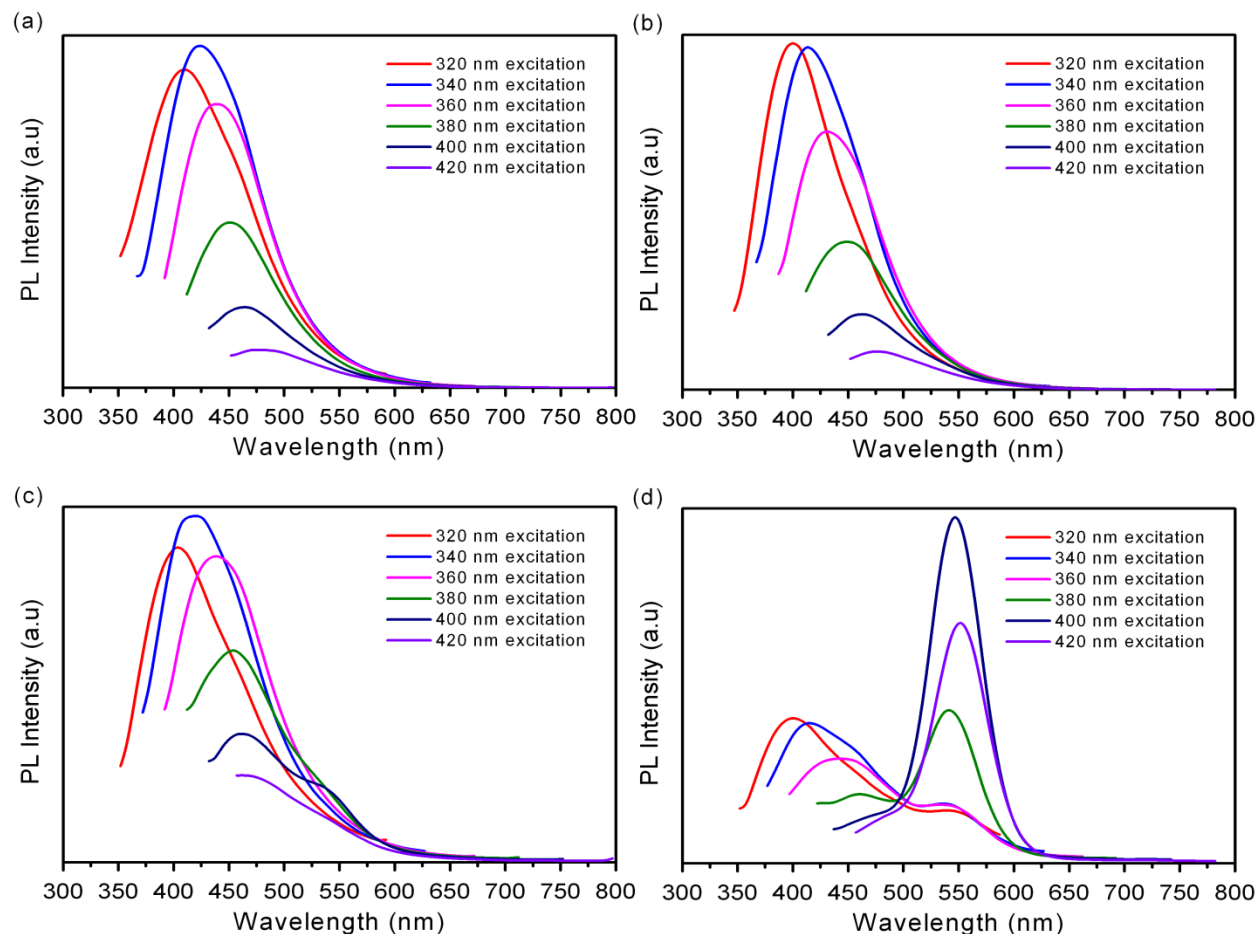

**Fig. ESI2.** Normalized photoluminescence spectra of aqueous dispersions of Ge NCs recorded using different excitation wavelengths for a) 3.5 nm, b) 3.7 nm, c) 4.1 nm and d) 4.5 nm nanocrystals.

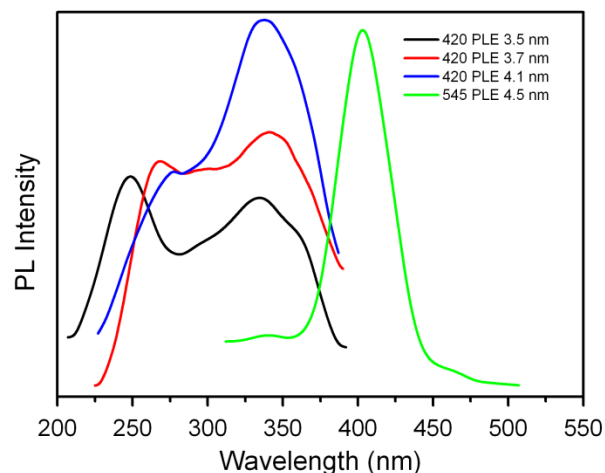

**Fig. ESI3.** Normalized photoluminescence excitation (PLE) spectra of aqueous dispersions of Ge nanocrystals. The wavelength positions at which the spectra were recorded are indicated.

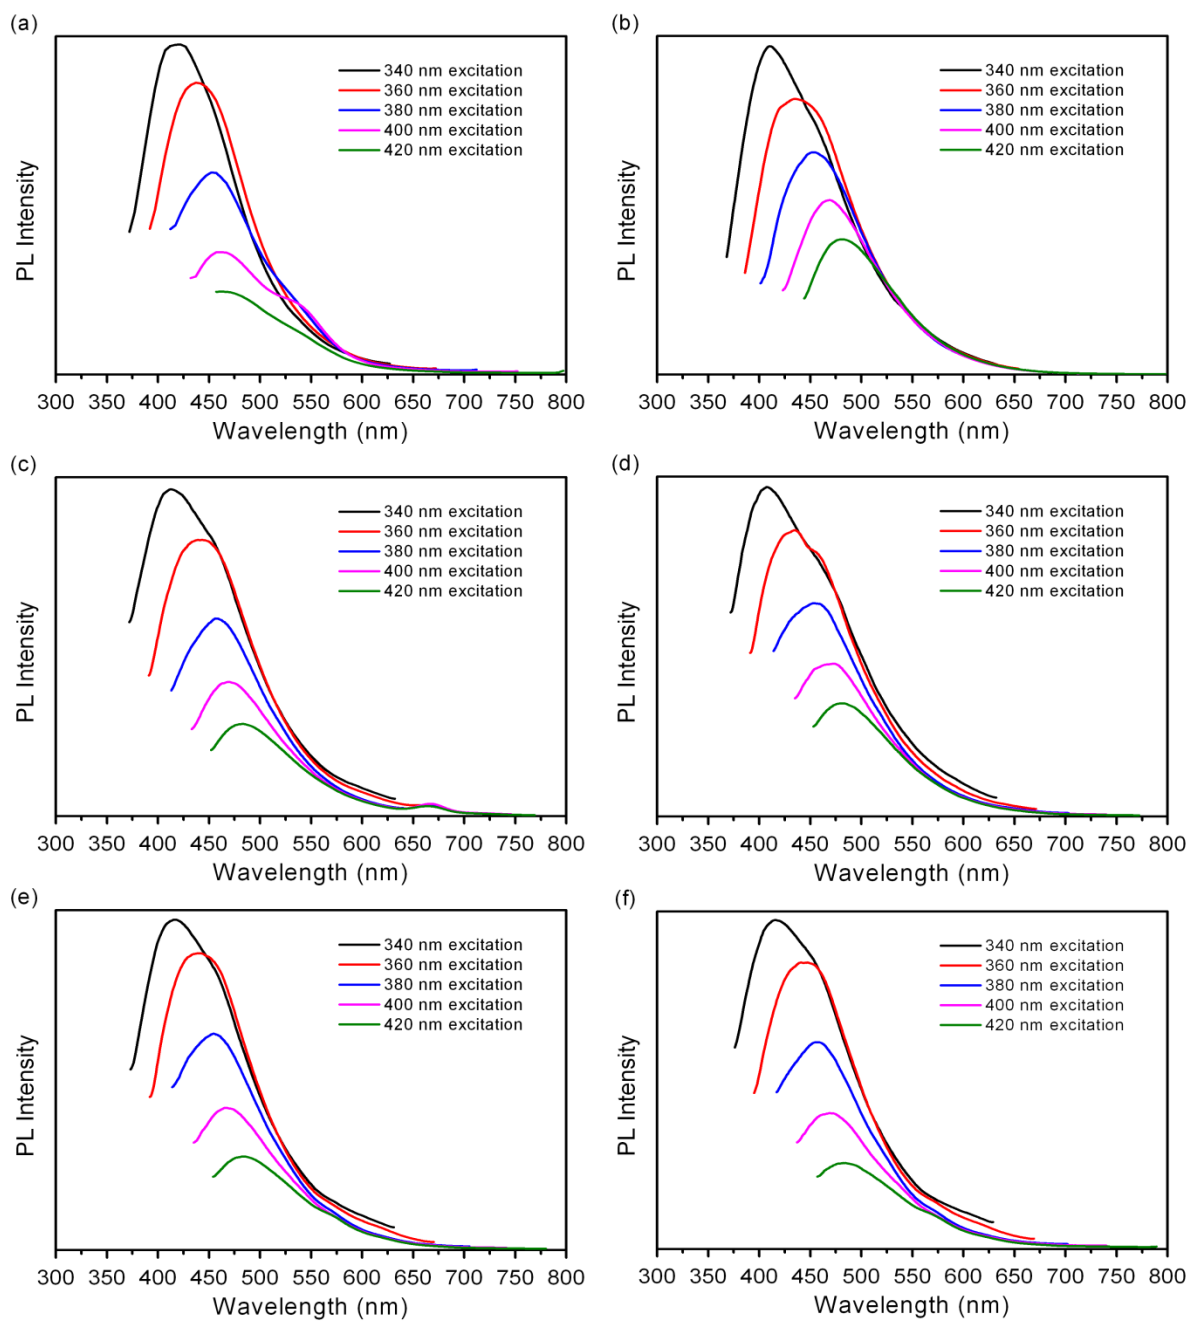

**Fig. ESI4.** Normalized photoluminescence spectra of Ge NCs dispersed in (a) water, (b) chloroform, (c) acetonitrile, d) dichloromethane, e) ethanol and f) methanol recorded using different excitation wavelengths.
